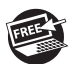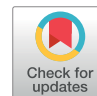

RESPONSE TO COMMENT ON PATHAK ET AL.

# Severe Hypoglycemia Requiring Medical Intervention in a Large Cohort of Adults With Diabetes Receiving Care in U.S. Integrated Health Care Delivery Systems: 2005–2011. *Diabetes Care* 2016;39:363–370

*Diabetes Care* 2017;40:e26 | DOI: 10.2337/dci16-0037

Ram D. Pathak,<sup>1</sup> Emily B. Schroeder,<sup>2</sup> Elizabeth R. Seaquist,<sup>3</sup> Chan Zeng,<sup>2</sup> Jennifer Elston Lafata,<sup>4,5</sup> Abraham Thomas,<sup>5</sup> Jean M. Lawrence,<sup>6</sup> Andrew J. Karter,<sup>7</sup> John F. Steiner,<sup>2</sup> Jodi Segal,<sup>8</sup> and Patrick J. O'Connor,<sup>9</sup> for the SUPREME-DM Study Group

In a comment (1) on our article in *Diabetes Care* (2), Dr. Philip Home posits that the association of severe hypoglycemic events with other medical conditions and the use of diagnoses from hospitalized patients could explain the high event rate noted in our study compared with other reports based in the ambulatory care setting. Home correctly notes that use of secondary hypoglycemia diagnoses and diagnoses from inpatient hospital admissions may overestimate the rate of severe hypoglycemia as the primary cause of visits in emergency departments or that result in hospital admission. To clarify, our analyses relied on only primary or principal diagnosis codes. In addition, only 20% of our events included only inpatient diagnosis codes. Although our event rate is higher than those reported in clinical trials (1.4–1.6 events

per 100 person-years (2) vs. 0.3–1.0 events per 100 person-years [3–5]), there are several potential explanations for higher hypoglycemia rates in community settings. We hope further work will develop additional methods for minimizing misclassification in hypoglycemia definitions and will clarify factors that increase hypoglycemia risk in community settings.

**Duality of Interest.** E.B.S. was supported by National Institute of Diabetes and Digestive and Kidney Diseases grant K23DK099237. E.R.S. served as a consultant for Sanofi. No other potential conflicts of interest relevant to this article were reported.

## References

1. Home PD. Comment on Pathak et al. Severe hypoglycemia requiring medical intervention in a large cohort of adults with diabetes receiving

care in U.S. integrated health care delivery systems: 2005–2011. *Diabetes Care* 2016;39:363–370 (Letter). *Diabetes Care* 2017;40:e25. DOI: 10.2337/dci16-0527.

2. Pathak RD, Schroeder EB, Seaquist ER, et al.; SUPREME-DM Study Group. Severe hypoglycemia requiring medical intervention in a large cohort of adults with diabetes receiving care in U.S. integrated health care delivery systems: 2005–2011. *Diabetes Care* 2016;39:363–370

3. ADVANCE Collaborative Group, Patel A, MacMahon S, et al. Intensive blood glucose control and vascular outcomes in patients with type 2 diabetes. *N Engl J Med* 2008;358:129–139

4. Gerstein HC, Miller ME, Byington RP, et al.; Action to Control Cardiovascular Risk in Diabetes Study Group. Effects of intensive glucose lowering in type 2 diabetes. *N Engl J Med* 2008;358:2545–2559

5. ORIGIN Trial Investigators. Predictors of non-severe and severe hypoglycemia during glucose-lowering treatment with insulin glargine or standard drugs in the ORIGIN trial. *Diabetes Care* 2015;38:22–28

<sup>1</sup>Marshfield Clinic, Marshfield, WI

<sup>2</sup>Kaiser Permanente Colorado, Institute for Health Research, Denver, CO

<sup>3</sup>Department of Medicine, University of Minnesota, Minneapolis, MN

<sup>4</sup>Virginia Commonwealth University, Richmond, VA

<sup>5</sup>Henry Ford Health System, Detroit, MI

<sup>6</sup>Kaiser Permanente Southern California, Pasadena, CA

<sup>7</sup>Kaiser Permanente Northern California, Oakland, CA

<sup>8</sup>Johns Hopkins University, Baltimore, MD

<sup>9</sup>HealthPartners Institute for Education and Research, Minneapolis, MN

Corresponding author: Ram D. Pathak, pathak.ram@marshfieldclinic.org.

© 2017 by the American Diabetes Association. Readers may use this article as long as the work is properly cited, the use is educational and not for profit, and the work is not altered. More information is available at <http://www.diabetesjournals.org/content/license>.
